# Supplementary material for: UCSCXenaShiny: an R/CRAN package for interactive analysis of UCSC Xena data
Source: PubMed Central journal article supplement (PMC8723150; doi:10.1093/bioinformatics/btab561), 2021-07-29
Supplement: btab561_supplementary_data.pdf [file btab561_supplementary_data.pdf]

## Data Query

Functions to query data from UCSC Xena data hubs in single molecular level. The functionality of functions below may overlap, we rank them by importance.

|                                                |                                                                                                  |
|------------------------------------------------|--------------------------------------------------------------------------------------------------|
| <a href="#">query_molecule_value()</a>         | Get Molecule or Signature Data Values from Dense (Genomic) Matrix Dataset of UCSC Xena Data Hubs |
| <a href="#">query_pancan_value()</a>           | Query Single Identifier or Signature Value from Pan-cancer Database                              |
| <a href="#">get_ccle_cn_value()</a>            | Fetch Identifier Value from Pan-cancer Dataset                                                   |
| <a href="#">get_ccle_gene_value()</a>          |                                                                                                  |
| <a href="#">get_ccle_protein_value()</a>       |                                                                                                  |
| <a href="#">get_ccle_mutation_status()</a>     |                                                                                                  |
| <a href="#">get_pancan_value()</a>             |                                                                                                  |
| <a href="#">get_pancan_gene_value()</a>        |                                                                                                  |
| <a href="#">get_pancan_transcript_value()</a>  |                                                                                                  |
| <a href="#">get_pancan_protein_value()</a>     |                                                                                                  |
| <a href="#">get_pancan_mutation_status()</a>   |                                                                                                  |
| <a href="#">get_pancan_cn_value()</a>          |                                                                                                  |
| <a href="#">get_pancan_methylation_value()</a> | Obtain ToilHub Info for Single Molecule                                                          |
| <a href="#">get_pancan_miRNA_value()</a>       |                                                                                                  |
| <a href="#">query_toil_value_df()</a>          | Show Available Hosts                                                                             |
| <a href="#">query_toil_value_df()</a>          |                                                                                                  |
| <a href="#">available_hosts()</a>              |                                                                                                  |

## Analysis and Visualiation for Pan-Cancer Study

Functions to analyze and visualize data mainly from TCGA and CCLE

|                                                   |                                  |                                                                                                                       |
|---------------------------------------------------|----------------------------------|-----------------------------------------------------------------------------------------------------------------------|
| <a href="#">tcga_surv_get()</a>                   | <a href="#">tcga_surv_plot()</a> | TCGA Survival Analysis                                                                                                |
| <a href="#">analyze_gene_drug_response_asso()</a> |                                  | Analyze Association between Gene (Signature) and Drug Response with CCLE Data                                         |
| <a href="#">vis_gene_drug_response_asso()</a>     |                                  | Visualize Gene and Drug-Target Association with CCLE Data                                                             |
| <a href="#">analyze_gene_drug_response_diff()</a> |                                  | Analyze Difference of Drug Response (IC50 Value (uM)) between Gene (Signature) High and Low Expression with CCLE Data |
| <a href="#">vis_gene_drug_response_diff()</a>     |                                  | Visualize Gene and Drug Response Difference with CCLE Data                                                            |
| <a href="#">vis_ccle_tpm()</a>                    |                                  | Visualize CCLE Gene Expression                                                                                        |
| <a href="#">vis_ccle_gene_cor()</a>               |                                  | Visualize CCLE Gene Expression Correlation                                                                            |
| <a href="#">vis_gene_TIL_cor()</a>                |                                  | Heatmap for Correlation between Gene and Tumor Immune Infiltration (TIL)                                              |
| <a href="#">vis_gene_immune_cor()</a>             |                                  | Heatmap for Correlation between Gene and Immune Signatures                                                            |
| <a href="#">vis_gene_cor()</a>                    |                                  | Visualize Gene-Genes Correlation in TCGA                                                                              |
| <a href="#">vis_gene_cor_cancer()</a>             |                                  | Visualize Gene-Genes Correlation in a TCGA Cancer Type                                                                |
| <a href="#">vis_gene_stemness_cor()</a>           |                                  | Visualize Correlation between Gene and Tumor Stemness                                                                 |
| <a href="#">vis_gene_tmb_cor()</a>                |                                  | Visualize Correlation between Gene and TMB (Tumor Mutation Burden)                                                    |
| <a href="#">vis_gene_msi_cor()</a>                |                                  | Visualize Correlation between Gene and MSI (Microsatellite instability)                                               |
| <a href="#">vis_pancan_anatomy()</a>              |                                  | Visualize Single Gene Expression in Anatomy Location                                                                  |
| <a href="#">vis_toil_TvsN()</a>                   |                                  | Visualize Pan-cancer TPM (tumor (TCGA) vs Normal (TCGA & GTEx))                                                       |
| <a href="#">vis_toil_TvsN_cancer()</a>            |                                  | Visualize Gene TPM in Single Cancer Type (Tumor (TCGA) vs Normal (TCGA & GTEx))                                       |
| <a href="#">vis_unicox_tree()</a>                 |                                  | Visualize Single Gene Univariable Cox Result from Toil Data Hub                                                       |

## General Analysis and Visualiation

Functions to analyze and visualize general data, i.e., any valid data from UCSC Xena or users

|                                                 |                                                                                       |
|-------------------------------------------------|---------------------------------------------------------------------------------------|
| <a href="#">vis_identifier_cor()</a>            | Visualize Identifier-Identifier Correlation                                           |
| <a href="#">vis_identifier_multi_cor()</a>      | Visualize Correlation for Multiple Identifiers                                        |
| <a href="#">vis_identifier_grp_comparison()</a> | Visualize Comparison of an Molecule Identifier between Groups                         |
| <a href="#">vis_identifier_grp_surv()</a>       | Visualize Identifier Group Survival Difference                                        |
| <a href="#">ezcor()</a>                         | Run Correlation between Two Variables and Support Group by a Variable                 |
| <a href="#">ezcor_batch()</a>                   | Run correlation between two variables in a batch mode and support group by a variable |
| <a href="#">ezcor_partial_cor()</a>             | Run partial correlation                                                               |

**Table S1.** Major functions provided by *UCSCXenaShiny*. All public data and functions provided by the tool is available at <https://openbiox.github.io/UCSCXenaShiny/reference/index.html>.

Table S2

| Tool                                   |                                                                                 | UCSCXenaShiny                                                                                   | UCSC Xena Browser                                               | UCSCXenaTools                                                                                     | xenaPython                                                                                  |
|----------------------------------------|---------------------------------------------------------------------------------|-------------------------------------------------------------------------------------------------|-----------------------------------------------------------------|---------------------------------------------------------------------------------------------------|---------------------------------------------------------------------------------------------|
|                                        | Visual download                                                                 | Yes                                                                                             | Yes (limited)                                                   | No                                                                                                | No                                                                                          |
| Data download features                 | Any dataset download                                                            | Yes                                                                                             | Yes                                                             | Yes                                                                                               | No                                                                                          |
|                                        | Any data subset download                                                        | Yes                                                                                             | Yes                                                             | Yes                                                                                               | Yes                                                                                         |
|                                        | TCGA/CCLL data quick query                                                      | Yes                                                                                             | No                                                              | No                                                                                                | No                                                                                          |
|                                        | Plot data download                                                              | Yes                                                                                             | Yes                                                             | No                                                                                                | No                                                                                          |
| General analysis features              | Scatter correlation (for two variables)                                         | Yes                                                                                             | Yes                                                             | No                                                                                                | No                                                                                          |
|                                        | Correlation heatmap (for multiple variables)                                    | Yes                                                                                             | No                                                              | No                                                                                                | No                                                                                          |
|                                        | Group comparison                                                                | Yes                                                                                             | Yes                                                             | No                                                                                                | No                                                                                          |
|                                        | Survival analysis                                                               | Yes                                                                                             | Yes                                                             | No                                                                                                | No                                                                                          |
|                                        | Genomic signatures                                                              | Yes                                                                                             | Yes                                                             | No                                                                                                | No                                                                                          |
|                                        | Sample filtering                                                                | Yes                                                                                             | Yes                                                             | No                                                                                                | No                                                                                          |
|                                        | Custom data support                                                             | Yes                                                                                             | Yes                                                             | No                                                                                                | No                                                                                          |
|                                        | Visual spreadsheet                                                              | No                                                                                              | Yes                                                             | No                                                                                                | No                                                                                          |
| Specified pan-cancer analysis features | TCGA/GTEX, PCAWG, CCLL molecular profile value distribution                     | Yes                                                                                             | No                                                              | No                                                                                                | No                                                                                          |
|                                        | TCGA, PCAWG, CCLL molecular profile correlation                                 | Yes                                                                                             | No                                                              | No                                                                                                | No                                                                                          |
|                                        | CCLL drug sensitivity analysis                                                  | Yes                                                                                             | No                                                              | No                                                                                                | No                                                                                          |
|                                        | TCGA/GTEX molecular profile anatomy                                             | Yes                                                                                             | No                                                              | No                                                                                                | No                                                                                          |
|                                        | TCGA, PCAWG molecular profile survival analysis                                 | Yes                                                                                             | Yes (limited)                                                   | No                                                                                                | No                                                                                          |
|                                        | TCGA molecular profile and immune signature/infiltration association            | Yes                                                                                             | No                                                              | No                                                                                                | No                                                                                          |
|                                        | TCGA, PCAWG molecular profile and tumor features (stemness/MSI/TMB) association | Yes                                                                                             | No                                                              | No                                                                                                | No                                                                                          |
| Generate publication ready plots       |                                                                                 | Yes                                                                                             | No                                                              | No                                                                                                | No                                                                                          |
| Has API                                |                                                                                 | Yes (available in self-constructed R package)                                                   | Yes (available as UCSCXenaTools and xenaPython)                 | It's itself an API                                                                                | It's itself an API                                                                          |
| Target user type                       |                                                                                 | User with and without programming background                                                    | User without programming background                             | User with programming background                                                                  | User with programming background                                                            |
| URL                                    |                                                                                 | <a href="https://github.com/openbio/UCSCXenaShiny">https://github.com/openbio/UCSCXenaShiny</a> | <a href="https://xenabrowser.net/">https://xenabrowser.net/</a> | <a href="https://github.com/ropensci/UCSCXenaTools">https://github.com/ropensci/UCSCXenaTools</a> | <a href="https://github.com/ucscXena/xenaPython">https://github.com/ucscXena/xenaPython</a> |

**Table S2.** A comparison of different tools for retrieving and analysis of UCSC Xena's data. Note: "API" means application programming interface. "URL" means uniform resource locator.

A

How to use repository

Active Data Hub:

- UCSC Public
- TCGA
- GDC
- ICGC
- Pan-Cancer Atlas
- TOIL
- Treehouse
- PCAWG
- ATAC-seq
- Single Cell

Cohort Name:

Data Type:

- Phenotype
- Feature by sample matrix
- Genomic segments
- Mutations

Data Subtype:

Show 10 entries

| Dataset                      | Hub    | Cohort                         | Samples | Subtype                                  | Label                                | Unit                |
|------------------------------|--------|--------------------------------|---------|------------------------------------------|--------------------------------------|---------------------|
| TCGA-BLCA.cnv.tsv            | gdcHub | GDC TCGA Bladder Cancer (BLCA) | 415     | copy number                              | Copy Number Segment                  | log2(copy-number/2) |
| TCGA-BLCA.GDC_phenotype.tsv  | gdcHub | GDC TCGA Bladder Cancer (BLCA) | 454     | phenotype                                | Phenotype                            |                     |
| TCGA-BLCA.gistic.tsv         | gdcHub | GDC TCGA Bladder Cancer (BLCA) | 413     | copy number (gene-level)                 | GISTIC - focal score by gene         | Gistic2 copy number |
| TCGA-BLCA.htseq_counts.tsv   | gdcHub | GDC TCGA Bladder Cancer (BLCA) | 430     | gene expression RNAseq                   | HTSeq - Counts                       | log2(count+1)       |
| TCGA-BLCA.htseq_fpkm.tsv     | gdcHub | GDC TCGA Bladder Cancer (BLCA) | 430     | gene expression RNAseq                   | HTSeq - FPKM                         | log2(fpkm+1)        |
| TCGA-BLCA.htseq_fpkm-ug.tsv  | gdcHub | GDC TCGA Bladder Cancer (BLCA) | 430     | gene expression RNAseq                   | HTSeq - FPKM-UQ                      | log2(fpkm-ug+1)     |
| TCGA-BLCA.masked_cnv.tsv     | gdcHub | GDC TCGA Bladder Cancer (BLCA) | 415     | copy number                              | Masked Copy Number Segment           | log2(copy-number/2) |
| TCGA-BLCA.methylation450.tsv | gdcHub | GDC TCGA Bladder Cancer (BLCA) | 437     | DNA methylation                          | Illumina Human Methylation 450       | beta value          |
| TCGA-BLCA.mimats.tsv         | gdcHub | GDC TCGA Bladder Cancer (BLCA) | 432     | stem loop expression                     | miRNA Expression Quantification      | log2(RPM+1)         |
| TCGA-BLCA.muse_snv.tsv       | gdcHub | GDC TCGA Bladder Cancer (BLCA) | 411     | somatic mutation (SNPs and small INDELs) | MuSE Variant Aggregation and Masking |                     |

Showing 1 to 10 of 534 entries

Show Metadata Request Data Analyze Data

B

| TCGA-BLCA.GDC_phenotype.tsv  | gdcHub | GDC TCGA Bladder Cancer (BLCA) | 454 | phenotype                                | Phenotype                            |
|------------------------------|--------|--------------------------------|-----|------------------------------------------|--------------------------------------|
| TCGA-BLCA.cnv.tsv            | gdcHub | GDC TCGA Bladder Cancer (BLCA) | 415 | copy number (gene-level)                 | Gistic2 copy number                  |
| TCGA-BLCA.gistic.tsv         | gdcHub | GDC TCGA Bladder Cancer (BLCA) | 413 | copy number (gene-level)                 | GISTIC - focal score by gene         |
| TCGA-BLCA.htseq_counts.tsv   | gdcHub | GDC TCGA Bladder Cancer (BLCA) | 430 | gene expression RNAseq                   | HTSeq - Counts                       |
| TCGA-BLCA.htseq_fpkm.tsv     | gdcHub | GDC TCGA Bladder Cancer (BLCA) | 430 | gene expression RNAseq                   | HTSeq - FPKM                         |
| TCGA-BLCA.htseq_fpkm-ug.tsv  | gdcHub | GDC TCGA Bladder Cancer (BLCA) | 430 | gene expression RNAseq                   | HTSeq - FPKM-UQ                      |
| TCGA-BLCA.masked_cnv.tsv     | gdcHub | GDC TCGA Bladder Cancer (BLCA) | 415 | copy number                              | Masked Copy Number Segment           |
| TCGA-BLCA.methylation450.tsv | gdcHub | GDC TCGA Bladder Cancer (BLCA) | 437 | DNA methylation                          | Illumina Human Methylation 450       |
| TCGA-BLCA.mimats.tsv         | gdcHub | GDC TCGA Bladder Cancer (BLCA) | 432 | stem loop expression                     | miRNA Expression Quantification      |
| TCGA-BLCA.muse_snv.tsv       | gdcHub | GDC TCGA Bladder Cancer (BLCA) | 411 | somatic mutation (SNPs and small INDELs) | MuSE Variant Aggregation and Masking |

Showing 1 to 10 of 534 entries

Show Metadata Request Data Analyze Data

D

Submitted datasets:

| hosts | datasets                    | url                                                              | browse                                   |
|-------|-----------------------------|------------------------------------------------------------------|------------------------------------------|
| 1     | TCGA-BLCA.GDC_phenotype.tsv | https://gdc.xenahubs.net/download/TCGA-BLCA.GDC_phenotype.tsv.gz | https://xenabrowser.BLCA.GDC_phenoty     |
| 2     | TCGA-BLCA.htseq_counts.tsv  | https://gdc.xenahubs.net/download/TCGA-BLCA.htseq_counts.tsv.gz  | https://xenabrowser.BLCA.htseq_counts.t  |
| 3     | TCGA-BLCA.gistic.tsv        | https://gdc.xenahubs.net/download/TCGA-BLCA.gistic.tsv.gz        | https://xenabrowser.BLCA.gistic.tsv&host |

Download data directly Batch download in terminal Copy R download code

Dismiss

C

Detail information...

| Metadata       | dataset1                                                                                                              | dataset2                                                                  |
|----------------|-----------------------------------------------------------------------------------------------------------------------|---------------------------------------------------------------------------|
| 1 name         | TCGA-BLCA.GDC_phenotype.tsv                                                                                           | TCGA-BLCA.htseq_counts                                                    |
| 2 cohort       | GDC TCGA Bladder Cancer (BLCA)                                                                                        | GDC TCGA Bladder Cancer                                                   |
| 3 url          | https://docs.gdc.cancer.gov/Data/Release_Notes/Data_Release_Notes/Idata-release-180, https://api.gdc.cancer.gov/data/ | https://docs.gdc.cancer.gov/release-180, https://api.gdc.cancer.gov/data/ |
| 4 dataSubType  | phenotype                                                                                                             | gene expression RNAseq                                                    |
| 5 dataproducer | Genomic Data Commons                                                                                                  | Genomic Data Commons                                                      |
| 6 label        | Phenotype                                                                                                             | HTSeq - Counts                                                            |
| 7 type         | clinicalMatrix                                                                                                        | genomicMatrix                                                             |
| 8 wrangler     | Xena GDC ETL script                                                                                                   | Xena GDC ETL script                                                       |
| 9 version      | 08-07-2019                                                                                                            | 07-18-2019                                                                |
| 10 probeMap    |                                                                                                                       | genecodev22.annotation.gz                                                 |

Dismiss

E

Download data directly Batch download in terminal Copy R download code

```
# Load R package
library('UCSCXenaTools')

# Generate dataset(s) information
dataset_query <- structure(list(hosts = c("https://gdc.xenahubs.net", "https://gdc.xenahubs.net"), "h

# Download dataset(s)
dl <- XenaDownload(dataset_query,
  destdir = './', # At default, download to working directory
  download_probeMap = TRUE,
  trans_slash = TRUE)

# Load dataset(s) into R
datasets <- XenaPrepare(dl)
# Check data
datasets
```

F

2021-05-01-commands.sh

```
#!/usr/bin/env bash
#Usage: run bash 2021-05-01-commands.sh in your terminal under a desired directory
wget -c https://gdc.xenahubs.net/download/TCGA-BLCA.GDC_phenotype.tsv.gz
wget -c https://gdc.xenahubs.net/download/TCGA-BLCA.htseq_counts.tsv.gz
wget -c https://gdc.xenahubs.net/download/TCGA-BLCA.gistic.tsv.gz
```

**Figure S1.** Major features provided by “Repository” page of Shiny application of *UCSCXenaShiny*. (A) Interface of “Repository” page. The table on the main panel shows current available datasets. The filters on the left panel provide functionality to filter datasets. The three buttons shown on the bottom of the main panel are used to operate datasets selected by users. (B) How to select specified datasets. The rows in dataset table are clickable. When a row is selected, metadata of the corresponding dataset will be queried from UCSC Xena data hubs, and the download link and the link to observe the dataset in UCSC Xena browser are provided. (C) When the button “Show Metadata” is clicked, all important metadata of datasets are shown. (D) When the button “Request Data” is clicked, links of datasets are shown and three buttons are provided to download datasets. (E) When the button “Copy R download code” is clicked, the code will be shown to tell users how to download the selected datasets by R. (F) When the button “Batch download in terminal” is clicked, a Shell script containing download code with wget command is automatically downloaded by the user browser so that the user can run this script in terminal. See **Figure S4** for analyzing data after clicking the button “Analyze Data”.

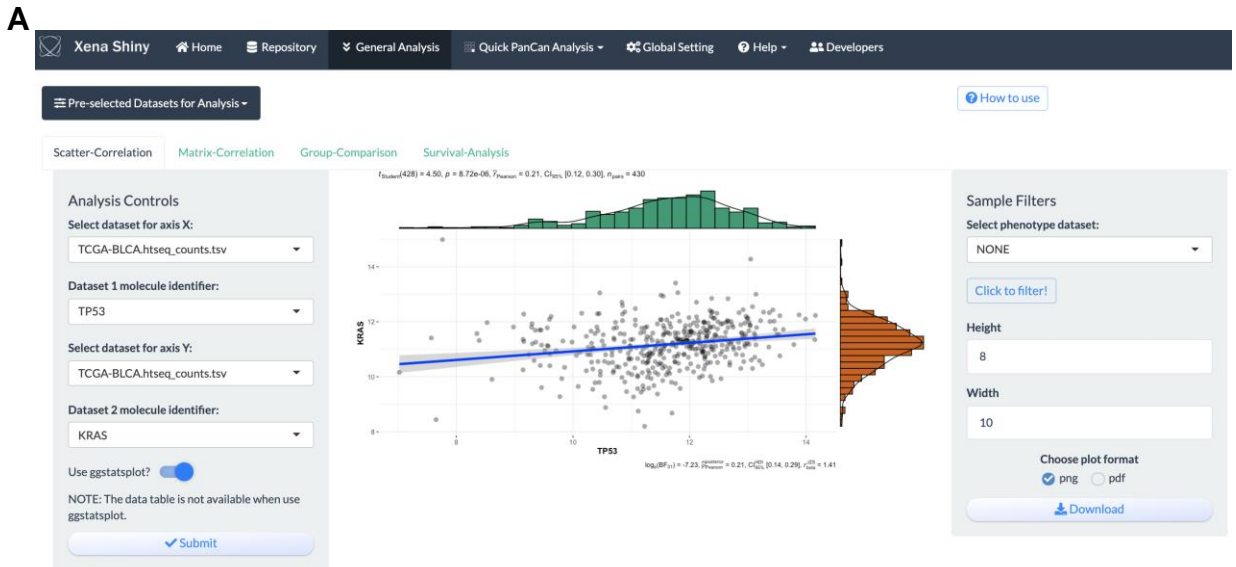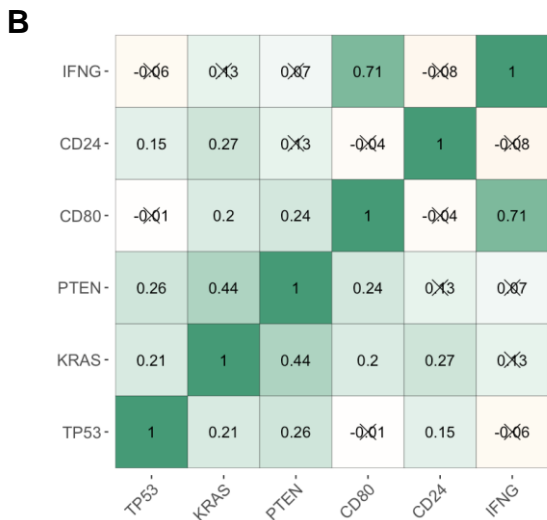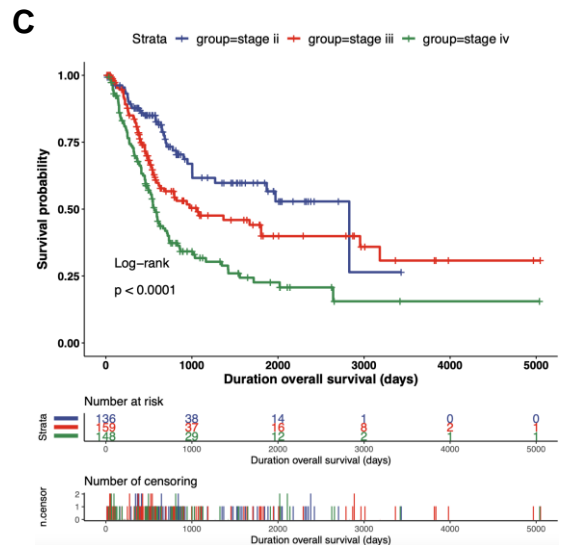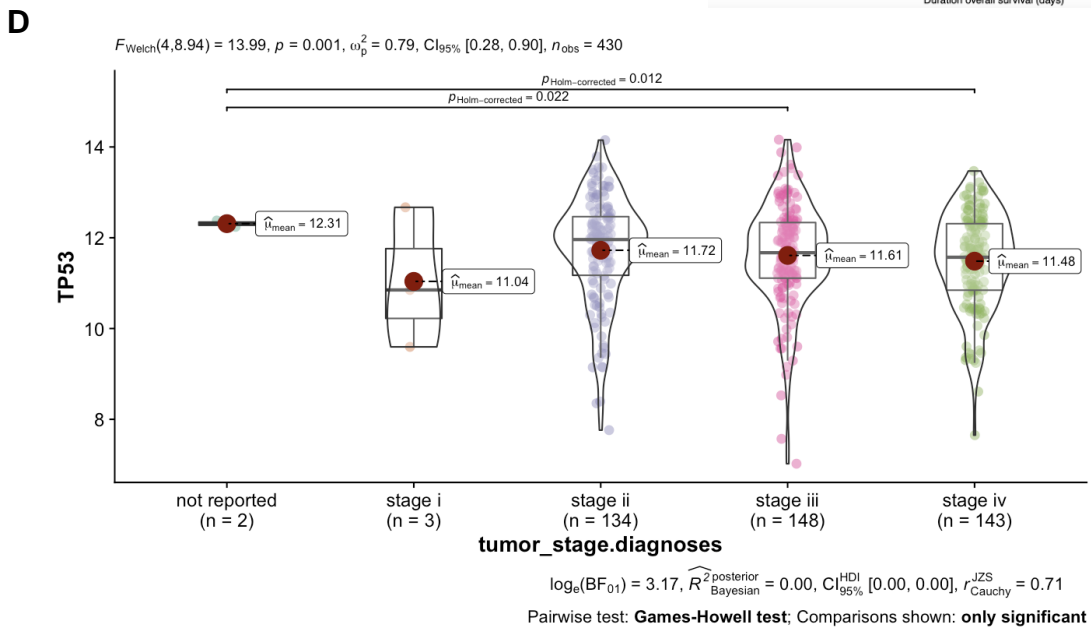

**Figure S2.** Features provided by “General Analysis” page of Shiny application of *UCSCXenaShiny*. Any dataset with proper format in UCSC Xena data hubs can be used for the current 4 supported analysis modules. (A) “Scatter-Correlation” module is used for exploring correlation between two continuous variables. The UI (user interface) widgets on the left and right sides of plot region are used for controlling analysis, visualization, sample filtering and result outputting. (B) “Matrix-Correlation” module is used for exploring correlation along multiple continuous variables. (C) “Survival-Analysis” module is used for exploring survival difference between sample groups. Here a continuous variable (e.g., mRNA expression of a gene) is supported to set sample groups by a threshold. (D) “Group-Comparison” module is used for exploring and visualizing value difference of a continuous variable between sample groups. The datasets used for demo analyses in this figure are selected shown as **Figure S3**.

**A**

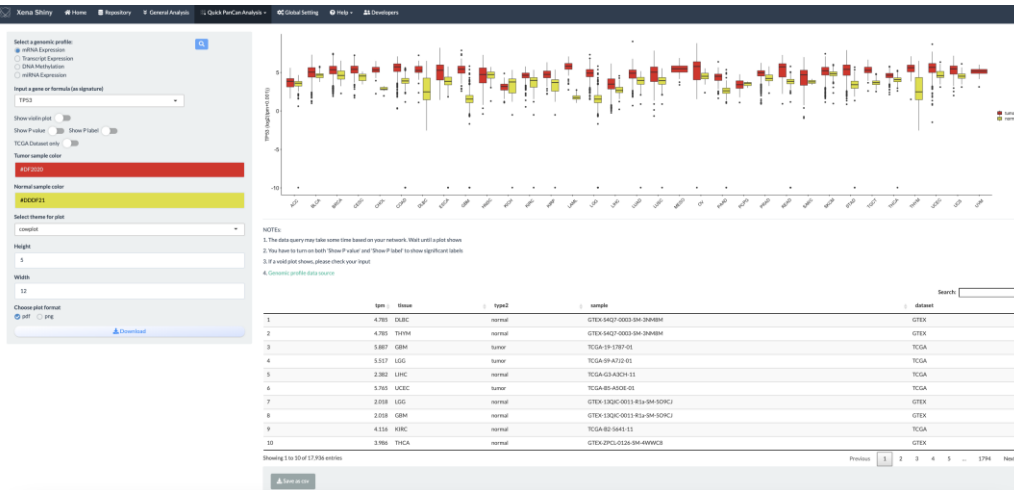

**B**

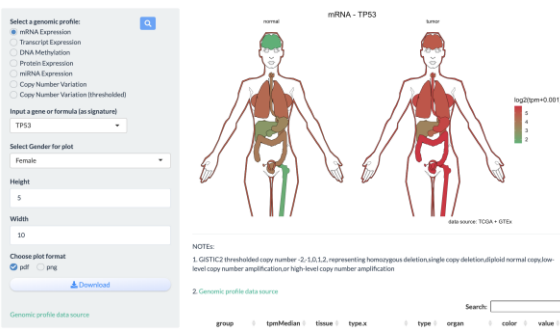

**C**

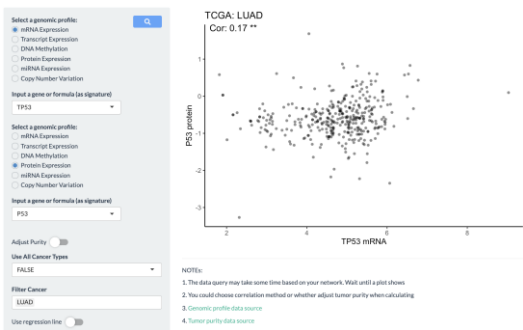

**D**

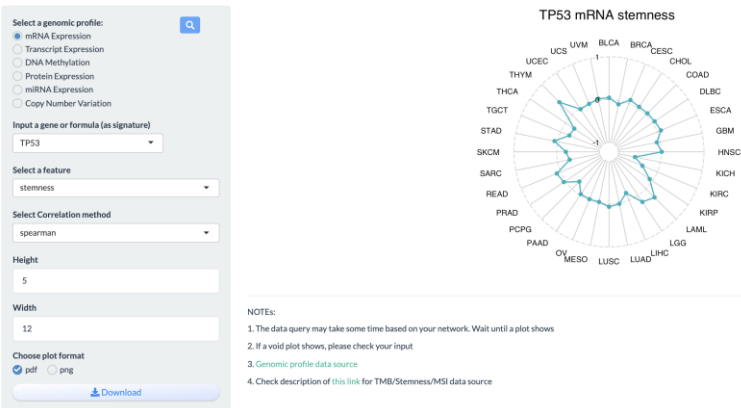

E

Select a genomic profile:

- mRNA Expression
- Transcript Expression
- DNA Methylation
- Protein Expression
- miRNA Expression
- Copy Number Variation

Input a gene or formula (as signature)

TP53

Select the immune signature source

Cibersort

Select Correlation method

spearman

Height

8

Width

12

Choose plot format

pdf  png

[Download](#)

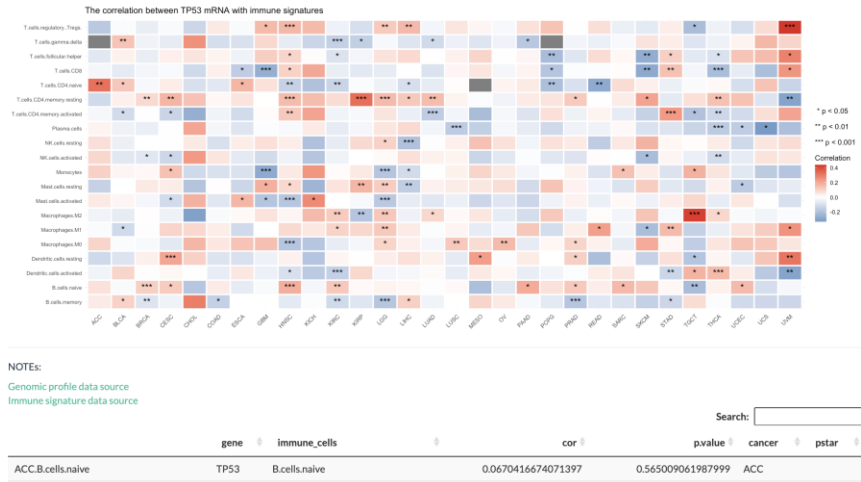

F

Choose a dataset:

LUAD

Select a genomic profile:

- mRNA Expression
- Transcript Expression
- miRNA Expression
- Mutations
- Copy Number Variation
- DNA Methylation
- Protein Expression

Item:

KRAS

[Submit](#)

Next step.

NOTES:

1. Not all dataset have clinical/pathological stages, so, in this case, the stage option is disabled.

2. The default option «Auto» will return the best p value, if you do not want to do so please choose «Custom».

Data source from Pan-Cancer Atlas Hub

Age

0 10 20 30 40 50 60 70 80 90 100

Sex

- Female
- Male
- Unknown

Clinical/Pathological stage

- I
- II
- III
- IV
- Unknown

Primary endpoint

OS  DSS  DFI  PFI

Cutoff mode

Auto  Custom

[GO!](#)

Height

25

Width

20

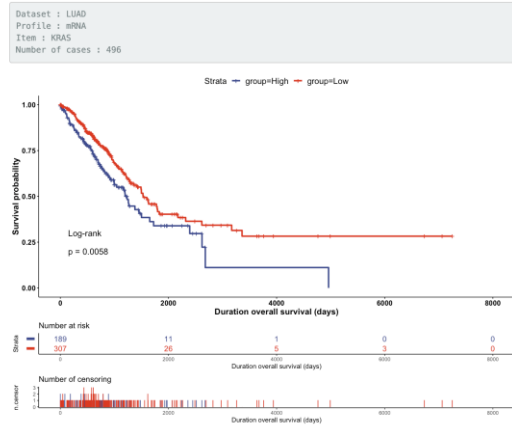

G

Select a genomic profile:

- mRNA Expression
- Transcript Expression
- DNA Methylation
- Protein Expression
- miRNA Expression
- Copy Number Variation

Input a gene or formula (as signature)

TP53

Select Measure for plot

OS

Select Threshold for plot

0.5

First color

#6A6F68

Second color

#E31A1C

Third color

#377DB8

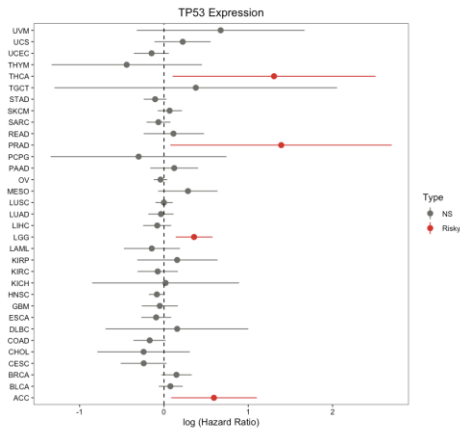

NOTES:

1. We define gene in certain cancer type as risky ( $\log(\text{Hazard Ratio}) > 0$ ) or protective ( $\log(\text{Hazard Ratio}) < 0$ ) or NS (No statistical significance,  $P$  value  $> 0.05$ )
2. We divide patients into different groups for comparison according to gene expression, you could choose the threshold for grouping (0.5 by default)
3. Genomic profile data source



**Figure S3.** Analysis features with TCGA/GTEX data provided by “Quick PanCan Analysis” page of Shiny application of *UCSCXenaShiny*. The analysis modules contains panels for parameters and outputting setting, visualization and data presentation. (A) The module showing molecular profile distribution, value difference between tumor and normal tissue across TCGA cancer types. (B) The module showing molecular profile distribution, value difference (between tumor and normal tissue) across tumor tissue origins. (C) The module showing correlation between two molecular profiles. (D) The module showing association between molecular profile and tumor features including stemness, TMB (tumor mutational burden) and MSI (microsatellite instability). (E) The module showing association between molecular profile and tumor immune signatures or immune cell subsets. (F) The module showing survival difference between sample groups corresponding different molecular profile levels in TCGA pan-cancer or specified tumor type. In this sub-plot, TCGA LUAD cohort is selected. (G) The module showing association between survival risk and molecular profile level across TCGA cancer types with univariable Cox models. NOTE: Some analysis pages are too large to show all the details.

**A**

Select a genomic profile:

- mRNA Expression
- Protein Expression
- Copy Number Variation

TP53

Height: 5

Width: 12

Choose plot format:

- pdf
- png

[Download](#)

[Genomic profile data source](#)

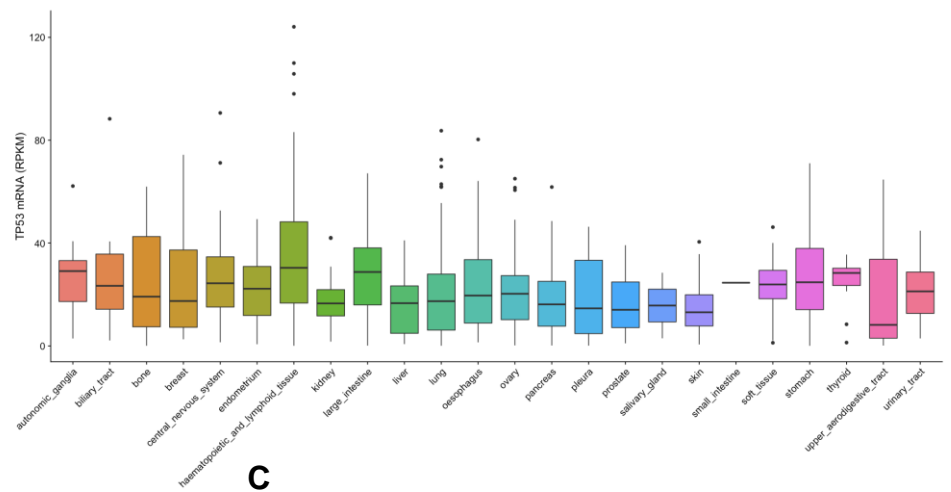

**B**

Select a genomic profile:

- mRNA Expression
- Protein Expression
- Copy Number Variation

CSF1R

Select a genomic profile:

- mRNA Expression
- Protein Expression
- Copy Number Variation

JAK3

Select Correlation method:

spearman

Use All Primary Sites

Filter Primary Site:

all

Use regression line

Cor: 0.29

sample: 1 228V1\_P0323MTE gene1: 0.0040E gene2: 0.0002E protein:

**C**

Input a gene or list (as signature):

TP53

Plot output form:

plotly

X-axis type:

mean.diff

Height:

6

Width:

8

Choose plot format (only support applet):

- pdf
- png

[Download](#)

**TP53 and Drug-Target Response Association**

Mean of expression difference between high and low IC50 cell lines

**D**

Input a gene or list (as signature):

TP53

Show P value:

High group color: #DF2020

Low group color: #DDDF21

Filter Tissue: lung

Choose a transparent value: 0.5

Height: 8

Width: 12

Choose plot format:

- pdf
- png

[Download](#)

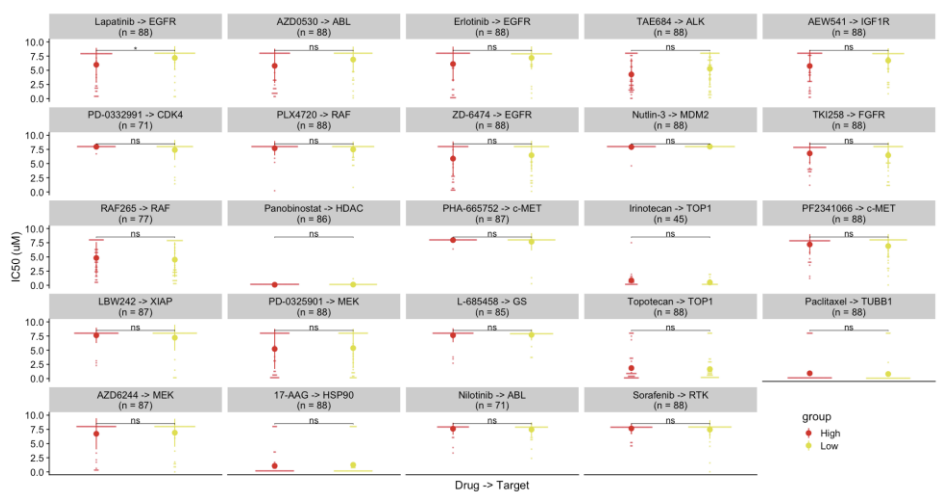

Method:

Analyze difference of drug response (IC50 value (uM)) between gene (or signature) high and low expression.

When there are multiple genes, geometrical mean of expression of these genes are used as a signature.

NOTES: You can select multiple tissues, even ALL for all tissues. In this case 'number\_of\_cell\_lines' indicates sample size for each gene-drug group instead of gene-drug-tissue group.

**Figure S4.** Analysis features with CCLE cancer cell line data provided by “Quick PanCan Analysis” page of Shiny application of *UCSCXenaShiny*. The analysis modules contains panels for parameters and outputting setting, visualization and data presentation. (A) The module showing molecular profile value distribution across CCLE cancer cell line tissue origins. (B) The module showing correlation between two molecular profiles. (C) The module showing association between gene mRNA expression and tumor drug response. (D) The module showing drug response IC50 value difference between low and high expression of a gene (use expression median as cutoff). NOTE: Some analysis pages are too large to show all the details.

## Table S3

|                                          | Purpose/key feature                                                                                                  | Downside                                                                                                                                                                                                      |
|------------------------------------------|----------------------------------------------------------------------------------------------------------------------|---------------------------------------------------------------------------------------------------------------------------------------------------------------------------------------------------------------|
| <b>UCSCXenaShiny</b>                     | An R package with both command caller and web GUI for interactively exploring UCSC Xena data.                        | It depends on R environment and has many dependent packages to support its analysis and visualization features.                                                                                               |
| <b>UCSC Xena Browser</b>                 | An online tool to explore functional genomic data sets for correlations between genomic and/or phenotypic variables. | 1) It can not be used to download datasets in batch or download a dataset subset. 2) It has no specific analysis and visualization modules for the most commonly used pan-cancer (TCGA, PCAWG, etc.) cohorts. |
| <b>UCSCXenaTools</b>                     | An R API to access both a dataset and a dataset subset from UCSC Xena data hubs.                                     | It has no analysis and visualization features for UCSC Xena datasets.                                                                                                                                         |
| <b>xenaPython</b>                        | A Python API to access a dataset subset from UCSC Xena data hubs.                                                    | 1) It can not be used to download a whole UCSC Xena dataset. 2) It has no analysis and visualization features for UCSC Xena datasets.                                                                         |
| <b>cBioPortal/GDC portal/ICGC portal</b> | Web resources for exploring multidimensional cancer genomics data.                                                   | They mainly act as cancer genomics data providers. Their analysis and visualization features are limited.                                                                                                     |
| <b>CVCDAP</b>                            | Seamless molecular and clinical analysis of a single TCGA cohort or comparison of two TCGA cohorts with relevance.   | 1) It cannot be used to download UCSC data. 2) Its analysis features are limited to TCGA datasets. 3) For user custom data, it only supports mutation analysis.                                               |

**Table S3.** Summary and comparison of the purpose/key feature and downside of UCSC Xena related tools (UCSCXenaShiny, UCSC Xena Browser, UCSCXenaTools, xenaPython) and other similar tools (cBioPortal, GDC portal, ICGC portal, CVCDAP).
